# Supplementary material
Source: PubMed Central journal article supplement (PMC8299666)
Supplement: NIHMS1717762-supplement-Supplementary_Tables.pdf [file NIHMS1717762-supplement-Supplementary_Tables.pdf]

**Manuscript: Cancer Biomark. 2019;26(3):291-301.**

Andrew Mitchell<sup>1\*</sup>, Sarrah L. Hasanali<sup>2\*</sup>, Daley S. Morera<sup>2</sup>, Rohitha Baskar<sup>2</sup>, Xin Wang<sup>2</sup>, Rahil Khan<sup>3</sup>, Asif Talukder<sup>1</sup>, Charles S. Li<sup>2</sup>, Meenakkshy Manoharan<sup>4</sup>, Andre R. Jordan<sup>2,5</sup>, Jiaojiao Wang<sup>2</sup>, Roni J. Bollag<sup>3,6</sup>, Nagendra Singh<sup>2</sup>, Daniel Albo<sup>1</sup>, Santu Ghosh<sup>7\*</sup>, Vinata B. Lokeshwar<sup>2\*</sup>

## **Supplementary Information**

### **A Chemokine/Chemokine Receptor Signature Potentially Predicts Clinical Outcome in Colorectal Cancer Patients**

**Mitchell et al.**

**Supplementary Table 1: Patient characteristics.** Patient characteristics in the clinical specimen cohort and in the available TCGA-dataset. Follow-up information was not available for time to metastasis in the TCGA-dataset. Note: In the TCGA-dataset, metastasis data is same as M-stage (metastasis at the time of diagnosis), as the follow-up data are not available to determine whether any M-stage negative patients developed metastasis later.

| <b>Parameter</b>                    | <b>Clinical cohort</b>         | <b>TCGA-dataset</b>                           |
|-------------------------------------|--------------------------------|-----------------------------------------------|
| Specimens                           | Normal = 27; Tumor = 49        | Tumor = 375                                   |
| Gender                              | Male: 25; Female: 24           | Male: 207; Female: 168                        |
| Age (years)                         | Median: 64; Mean: 62.3 ± 12.58 | Median: 66; Mean: 64.44 ± 13.09               |
| T-stage                             | T1: 4; T2: 11; T3: 28; T4: 6   | T1: 11; T2: 57; T3: 256; T4: 49<br>Missing: 2 |
| N-stage                             | (-): 25; (+): 24               | (-): 204; (+): 167<br>Missing: 4              |
| LVI                                 | (-): 34; (+): 15               | (-): 227; (+): 102<br>Missing: 46             |
| PNI                                 | (-): 39; (+): 10               | (-): 168; (+): 58<br>Missing: 149             |
| Metastasis                          | (-): 34; (+): 15               | (-): 252; (+): 51<br>Missing: 72              |
| Metastasis (months)                 | 26.97 ± 35.82                  |                                               |
| Overall survival                    | (-): 42; (+): 7                | (-): 280; (+): 86<br>Missing: 9               |
| Follow up months (overall survival) | 36.3 ± 36.76                   | 30.78 ± 26.6                                  |

**Supplementary Table 2: RT-qPCR primer sequences**

| Gene           | Forward Primer            | Reverse Primer            |
|----------------|---------------------------|---------------------------|
| CXCR-4         | 5'TCATCAAGCAAGGGTGTGAG3'  | 5'TGGCTCCAAGGAAAGCATAG3'  |
| CXCR-7         | 5'CAGCTTCATCAATCGCAACTA3' | 5'AGCTTGGTGAGCCCTGTTT3'   |
| SDF-1 $\alpha$ | 5'AAGCACAACAGCCAAAAAGG3'  | 5'TGCCCTTTCATCTCTCACAA3'  |
| SDF-1 $\beta$  | 5'CGCCTTTCCCAGGTGCTAAC3'  | 5'TGGTCTGCTTAGGGGATTTGG3' |
| IL-8           | 5'TTTGCCAAGGAGTGCTAAAGA3' | 5'GATAAATTTGGGGTGGAAAGG3' |
| IL-17A         | 5'GCCCAAATTCTGAGGACAAG3'  | 5'GGAGATTCCAAGGTGAGGTG3'  |
| GM-CSF         | 5' AGCCTCACCAAGCTCAAGG3'  | 5' AATCTGGGTTGCACAGGAAG3' |

**Supplementary Table 3:** Intercepts and coefficients for CXCR-4/7+SDF-1 signature (CXCR-4/7+SDF-1 $\beta$  in clinical cohort). Logistic regression analysis was used to calculate intercepts and coefficients ( $\alpha$ ) for the calculation of the signature. For both cohorts, the signature was calculated using metastasis and overall survival as a categorical variable.

| Metastasis       |                                                              |              |                                                    |
|------------------|--------------------------------------------------------------|--------------|----------------------------------------------------|
| Clinical cohort  |                                                              | TCGA-dataset |                                                    |
| Intercept        | Coefficient $\alpha$                                         | Intercept    | Coefficient $\alpha$                               |
| 4.663            | CXCR-4: -2.9178<br>CXCR-7: -1.3486<br>SDF-1 $\beta$ : 4.7398 | 3.5927       | CXCR-4: 0.0522<br>CXCR-7: -0.5131<br>SDF-1: 0.2282 |
| Overall Survival |                                                              |              |                                                    |
| Clinical cohort  |                                                              | TCGA-dataset |                                                    |
| Intercept        | Coefficient $\alpha$                                         | Intercept    | Coefficient $\alpha$                               |
| 2.3296           | CXCR-4: 0.02996<br>CXCR-7: -0.5862<br>SDF-1 $\beta$ : 0.5028 | 0.3529       | CXCR-4: 0.1022<br>CXCR-7: 0.1708<br>SDF-1: -0.18   |
